# Supplementary material for: Host–guest complexes of cucurbit[6]uril with phenethylamine-type stimulants
Source: Royal Society of Chemistry journal article supplement (doi:10.1039/c8ce01661e), 2018-01-01
Supplement: c8ce01661e1.pdf [file c8ce01661e1.pdf]

## Electronic Supplementary Information

# Host-Guest Complexes of Cucurbit[6]uril with Phenethylamine-Type Stimulants

Oksana Danylyuk

*Institute of Physical Chemistry, Polish Academy of Sciences, Kasprzaka 44/52, 01-224 Warsaw, Poland; E-mail: [odanylyuk@ichf.edu.pl](mailto:odanylyuk@ichf.edu.pl)*

**Distortion of CB6 molecule:** the highest possible symmetry of the **CB6** molecule is  $6/mmm$  ( $D_{6h}$ ). Such high symmetry is fulfilled only in few crystal structures of **CB6** complexes.[1] The degree of the distortion from the perfect  $D_{6h}$  symmetry can be expressed as the difference of the *max* and *min* distances between opposite carbon atoms of the **CB6** methine groups. In the ideal  $D_{6h}$  structure of **CB6** the distance between opposite CH carbon atoms is of 10.16 Å. Interestingly, the highest distortion of 13% (the difference in the *max* and *min* distances is 1.31 Å) was observed in the **CB6** inclusion complex with 4-methylpyridinium guest.[2] In the two studied complexes of **CB6** with octopamine the difference between *max* and *min* distances is of 0.33 Å (complex **3**) and 0.75 Å (complex **4**), corresponding to 3 and 7% distortion from the ideal  $D_{6h}$  symmetry.

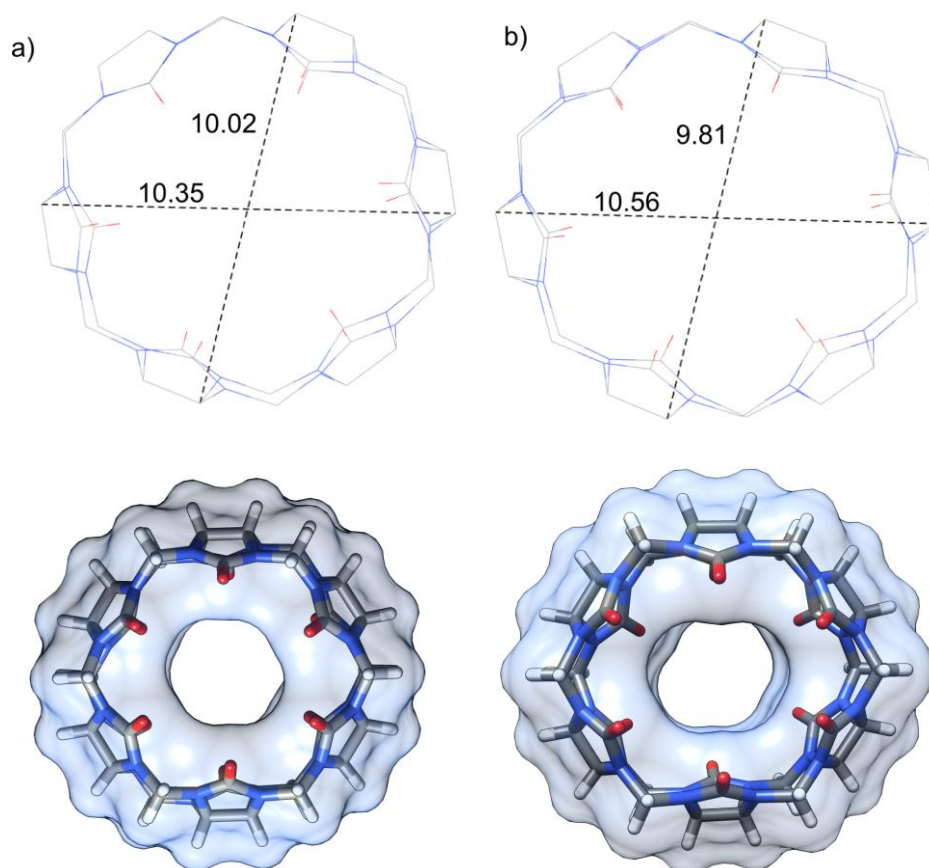

Fig. ESI-1 The distortion of **CB6** macrocycle from the perfect  $D_{6h}$  symmetry in the complexes **3** (a) and **4** (b), the *max* and *min* distances between opposite carbon atoms of the **CB6** methine groups are shown.

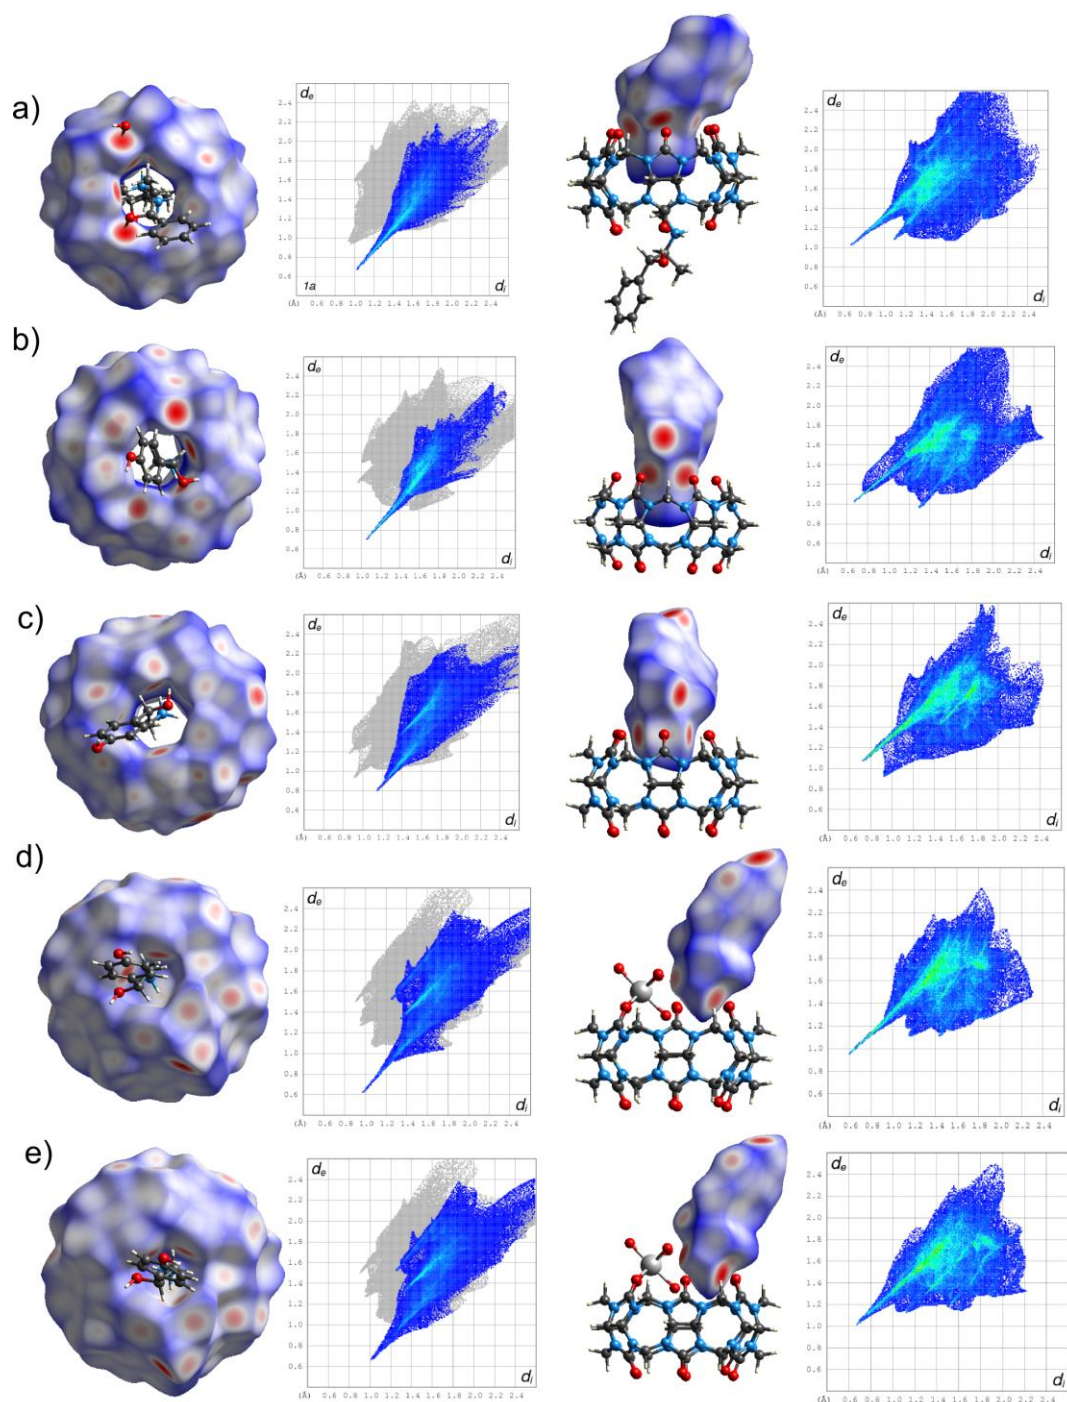

Fig. ESI-2 From left to right: the Hirshfeld surface of **CB6**, filtered fingerprint plot for **CB6** highlighting the close contacts for O atoms of **CB6** and all atoms outside the surface, Hirshfeld surface of the guest, fingerprint plot for the guest - for the complexes 1 (a), 2 (b), 3 (c), 4 (d and e, corresponding to two possible orientations of octopamine guest molecule due to structural disorder).

[1] D.G.Samsonenko, M.N.Sokolov, A.V.Virovets, N.V.Pervukhina, V.P.Fedin, *Eur.J.Inorg.Chem.*, **2001**, 1, 167; D.Bardelang, K.A.Udachin, D.M.Leek, J.A.Ripmeester, *CrystEngComm*, **2007**, 9, 973.

[2] D. G. Samsonenko, A. V. Virovets, J. Lipkowski, O. A. Geras'ko, V. P. Fedin, *J. Struct. Chem.*, **2002**, 43, 664.
